# Supplementary material for: Types of Membrane Transporters and the Mechanisms of Interaction between Them and Reactive Oxygen Species in Plants
Source: MDPI journal article supplement (doi:10.3390/antiox13020221), 2024-02-09
Supplement: s1 [file s1]

**Table S1.** Abbreviated list of membrane transporters name/family

| Abbreviation | Name/Family                                         |
|--------------|-----------------------------------------------------|
| HKT          | High affinity K <sup>+</sup> transporter            |
| LCT          | Low-affinity transporter                            |
| CNGC         | Nucleotide gated channel                            |
| GLR          | Ionotropic glucose receptor channel                 |
| SOS1         | Salt overly sensitive 1                             |
| NHX          | Na <sup>+</sup> /H <sup>+</sup> antiporter          |
| HAK          | High affinity K <sup>+</sup> transporter            |
| KT           | K <sup>+</sup> transporters                         |
| KUP          | K <sup>+</sup> uptake permease                      |
| AKT          | Arabidopsis K <sup>+</sup> transporter              |
| TPC          | Two-pore channel                                    |
| CHX          | Cation/H <sup>+</sup> antiporter                    |
| KEA          | K <sup>+</sup> efflux antiporter                    |
| OSCA         | Mechanosensitive channel                            |
| ACA          | Autoenriched Ca <sup>2+</sup> -ATPase               |
| NCL          | Ca <sup>2+</sup> /Na <sup>+</sup> exchange          |
| VCX          | Ca <sup>2+</sup> /H <sup>+</sup> exchange           |
| CAX          | Ca <sup>2+</sup> /H <sup>+</sup> exchange           |
| HMA          | Plasma membrane H <sup>+</sup> -ATPase              |
| VMA          | Vacuolar membrane H <sup>+</sup> -ATPase            |
| SLAC         | Slow anion channel                                  |
| CLC          | Chloride channel                                    |
| ALMT         | Aluminum-activated malate transporter               |
| NTR          | Nuclear transport receptor                          |
| MGT          | Mg <sup>2+</sup> transporter                        |
| YSL2         | Iron nicotianamine transporter yellow-stripe-like 2 |
| MTP          | Metal tolerance protein                             |
| VIT          | Vacuole iron transporter                            |
| CDF          | Cation diffusion facility transporter               |
| IRT          | Iron regulated transporter                          |
| NRAMP        | Natural resistance-associated macrophage protein    |
| ABC          | ATP binding cassette transporter                    |
| MRP          | Multidrug-associated protein                        |
| SUT          | Sugar transporter                                   |
| SWEET        | Sugar will be exported transporter                  |
| ERD6         | Early response to dehydration                       |
| STP          | Sugar transporter protein                           |
| pGlcT        | Plastic glucose transporter                         |
| INT          | Inositol transporter                                |
| VGT          | Vacuum glucose transporter                          |
| TST          | Tonoplast sugar transporter                         |

|       |                                                    |
|-------|----------------------------------------------------|
| PLT   | Polymer/monosacharide transporter                  |
| AAT   | Amino acid transporter                             |
| APC   | Amino acid polyamine choline transporter           |
| AAAP  | Amino acid/auxin permease                          |
| CAT   | Cation amino acid transporter                      |
| PHS   | Polyamine H <sup>+</sup> cotransporter             |
| ACT   | Amino acid/choline transporter                     |
| AAP   | Amino acid permanence                              |
| LHT   | Lysine/histidine transporter                       |
| ProT2 | Proline transporter                                |
| ANT   | Aromatic and neutral amino acid transporter        |
| AUX   | Putative auxin transporter                         |
| GAT   | GABA transporter                                   |
| GABP  | GABA permease                                      |
| MATE  | Multidrug and toxic compound extrusion transporter |
| PUP   | Purine uptake permease transporter                 |
| NRT   | Nitrate-peptide transporter                        |

---
